# Supplementary material
Source: publisher site journal article supplement (http://www.spandidos-publications.com/6224/downloadSupplementary)
Supplement: Supplementary file 1 [file downloadSupplementary]

## Sheet: Sheet1
Table SII. Information of patients involved in this study.
Patient ID	Age (years)	Sex	Calcific aortic valve disease (Yes/No)	Acute Stanford type A aortic dissection	Serious coronary heart disease	Heart tumor	Congenital heart disease	Other comorbidities
1	51	Male	Yes	No	No	No	No	No
2	46	Male	Yes	No	No	No	No	No
3	62	Female	Yes	No	No	No	No	No
4	41	Male	No	Yes	No	No	No	No
5	53	Female	No	Yes	No	No	No	No
6	55	Male	No	Yes	No	No	No	No
